# Supplementary material
Source: PubMed Central journal article supplement (PMC5001553)
Supplement: NIHMS800160-supplement-2.pdf [file NIHMS800160-supplement-2.pdf]

## SUPPLEMENTAL EXPERIMENTAL PROCEDURES

**Table S1. Primers**

| Gene   | Sequences (5' to 3')                                  |
|--------|-------------------------------------------------------|
| VEGFA  | F- ATCTTCAAGCCGTCCTGTGT<br>R- GCATTCACATCTGCTGTGCT    |
| VEGFC  | F- GAGGTCAAGGTCTTTGAAGGC<br>R- CTGTCCTGGTATTGAGGGTGG  |
| VEGFD  | F- TCACGCTCAGCATCCCATC<br>R- ACTTCTACGCATGTCTCTCTAGG  |
| VEGFR2 | F- TTTGGCAAATACAACCCTCAGA<br>R- GCAGAAGATACTGTCACCACC |
| VEGFR3 | F- CTGGCAAATGGTTACTCCATGA<br>R- ACAACCCGTGTGTCTTCACTG |
| HIF1a  | F- TCCCCTCTCCTGTAAGCAAG<br>R- TCGACGTTCAGAACTCATCCT   |
| RPSII  | F- CGTGACGAAGATGAAGATGC<br>R- GCACATTGAATCGCACAGTC    |

Mouse primer sequences were selected from Primer Bank (<http://pga.mgh.harvard.edu/primerbank/>).
